# Supplementary figures and images for: Quantitative Changes in the Transcription of Phytohormone-Related Genes: Some Transcription Factors Are Major Causes of the Wheat Mutant dmc Not Tillering
Source: MDPI journal article supplement (doi:10.3390/ijms19051324), 2018-04-29

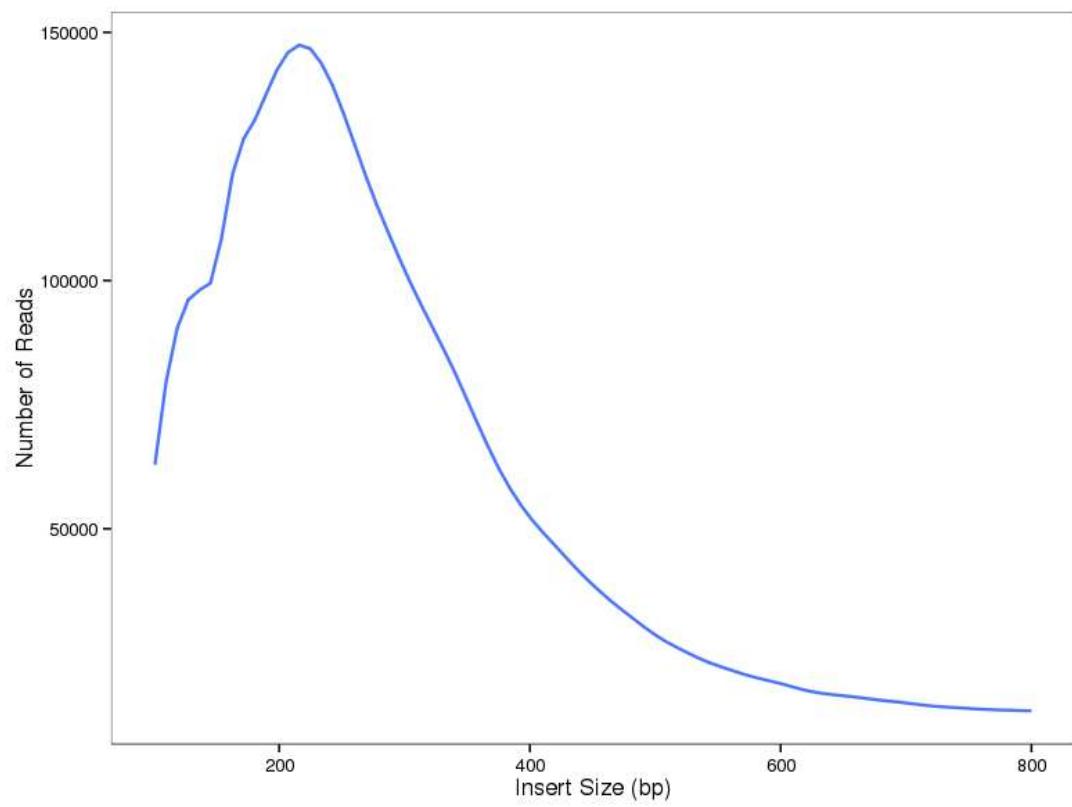

T1

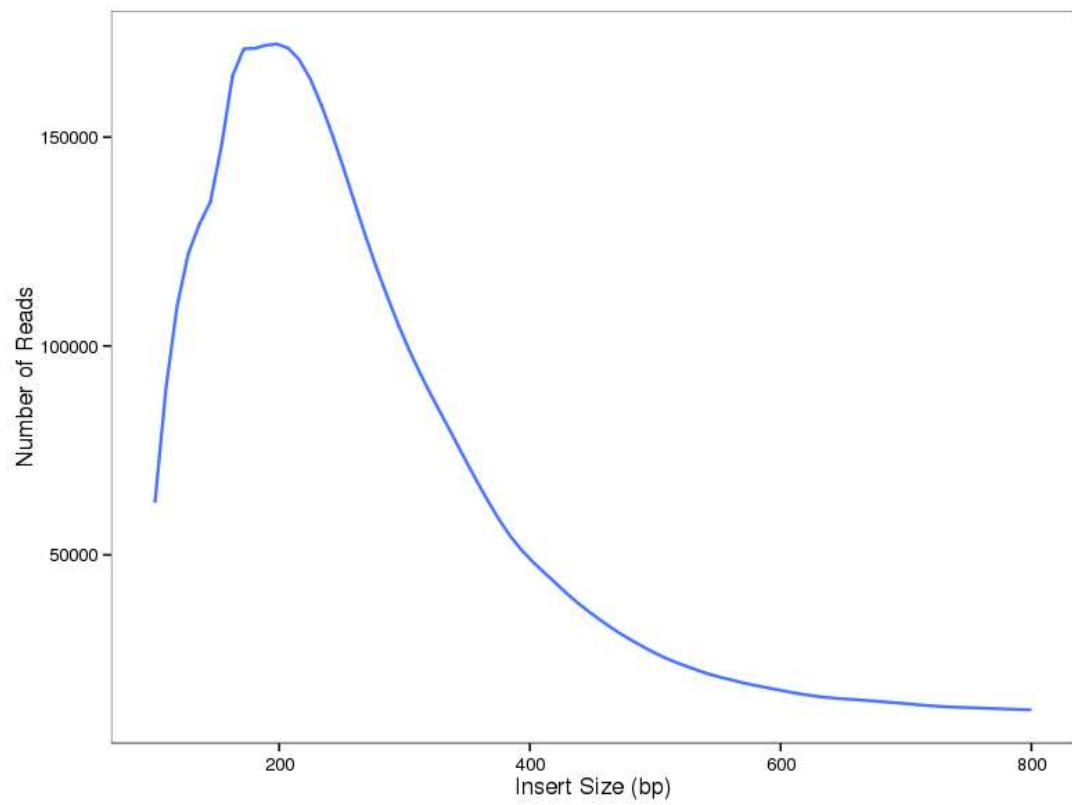

T2

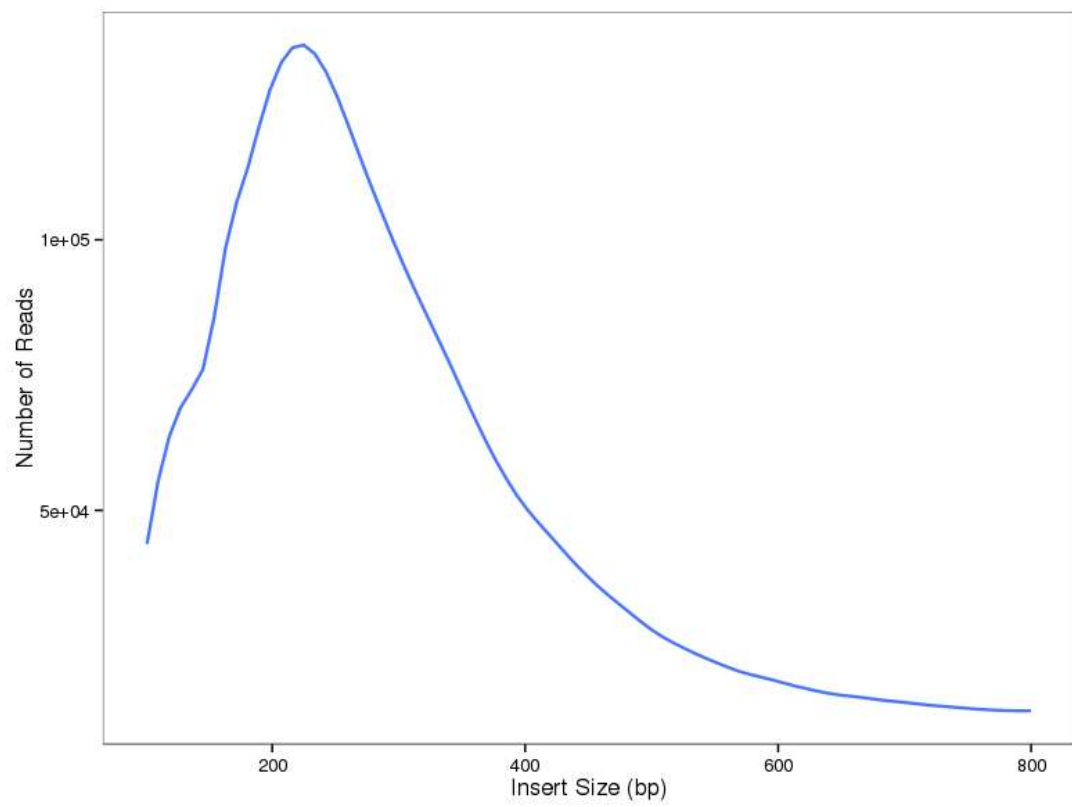

T3

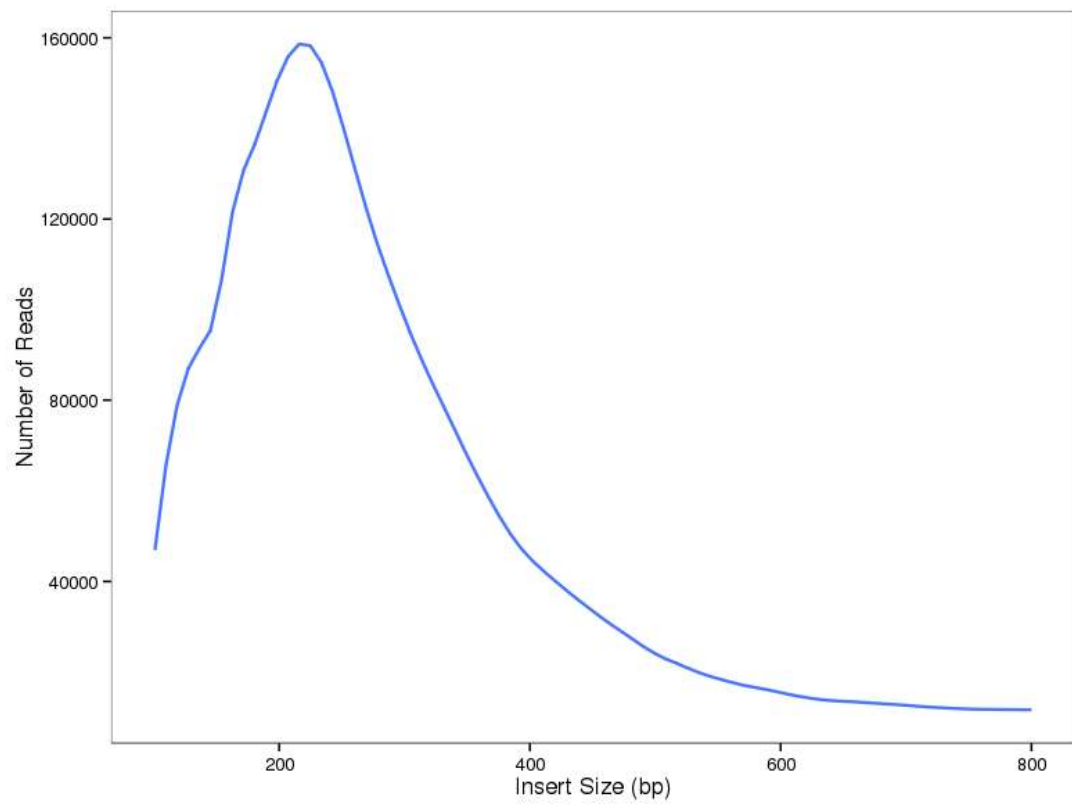

T4

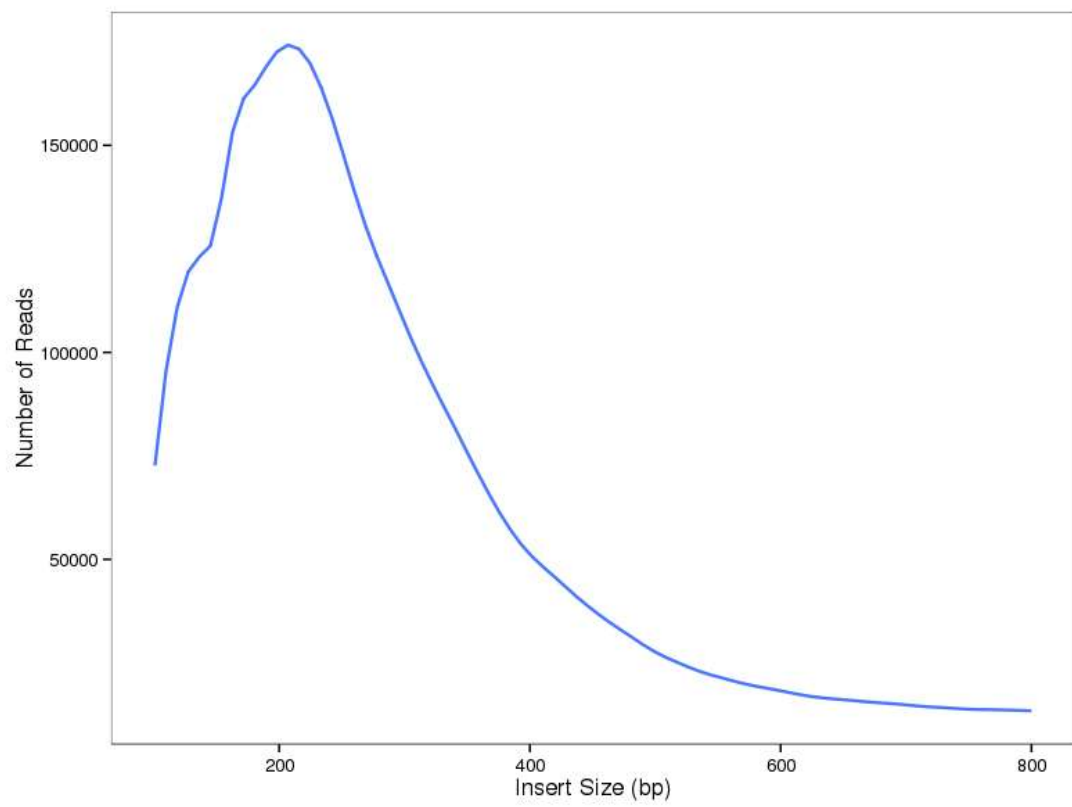

T5

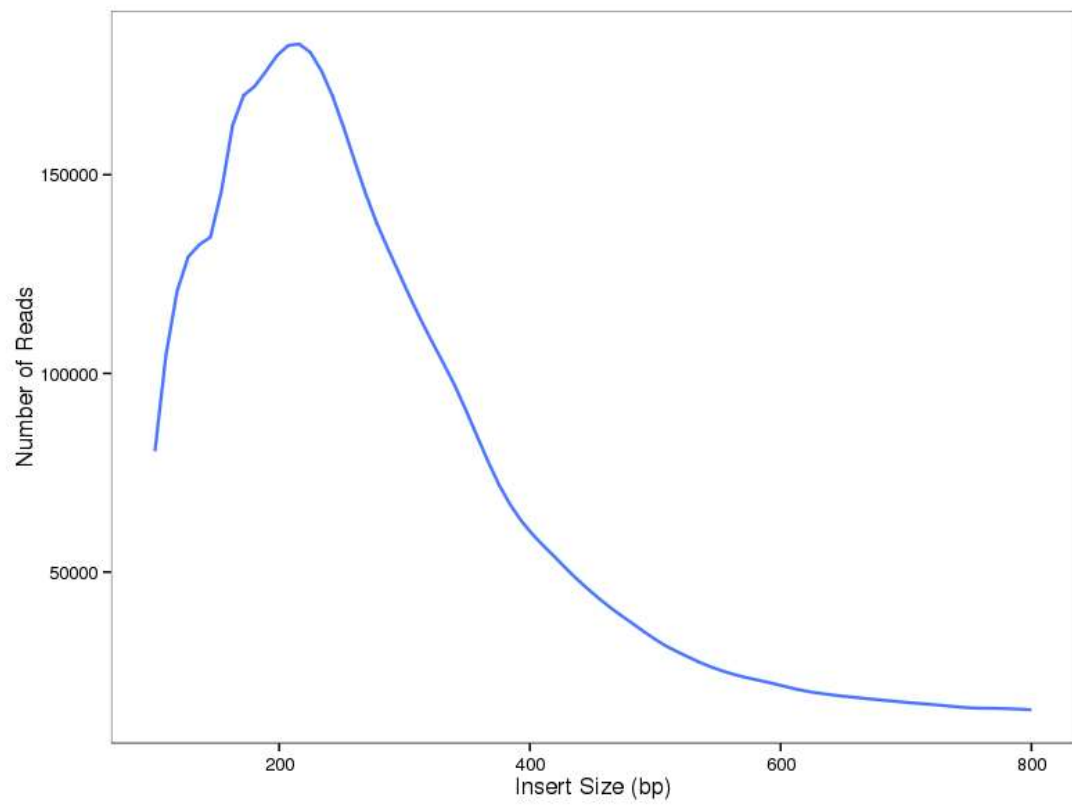

T6

Supplement: s1 [file s1]
